# Supplementary material for: “Sulfolefin”: Highly modular mixed S/Olefin ligands for enantioselective Rh-catalyzed 1,4-addition
Source: Royal Society of Chemistry journal article supplement (doi:10.1039/c2ob07132k), 2011-12-22

Electronic Supporting Information of the Manuscript:

**“SULFOLEFIN”: Highly Modular Mixed S/Olefin Ligands for Enantioselective Rh-Catalyzed 1,4 Addition.**

By: Nouredine Khier,\*<sup>a</sup> Álvaro Salvador,<sup>a</sup> Ahmed Chelouan,<sup>b</sup> Ana Alcudia,<sup>b</sup>  
Inmaculada Fernández.\*<sup>b</sup>

*Contribution from:* <sup>a</sup>*Instituto de Investigaciones Químicas, C.S.I.C-Universidad de Sevilla, c/. Américo Vespucio, 49., Isla de la Cartuja, 41092 Sevilla, Spain.*

<sup>b</sup>*Departamento de Química Orgánica y Farmacéutica, Facultad de Farmacia, Universidad de Sevilla, c/ Profesor García González, 2, 41012 Sevilla, Spain.*

Table of contents

|                                                                          |       |
|--------------------------------------------------------------------------|-------|
| TOC                                                                      | SI-2  |
| General Methods                                                          | SI-3  |
| Synthesis of sulfinamide-olefin ("sulfolefin") ligands                   | SI-4  |
| Representative procedure for the 1,4-addition of boronic acids to enones | SI-8  |
| Spectra collection                                                       | SI-13 |

## General Methods

All reactions were run under an atmosphere of dry argon using oven-dried glassware and freshly distilled and dried solvents. Toluene, CH<sub>2</sub>Cl<sub>2</sub> and diethyl ether were dried on an Innovative technology drying system. The metallic precursors were purchased from Strem Chemicals and the rest of the chemicals were obtained from Sigma-Aldrich and used without further purification. TLC was performed on Silica Gel GF254 (Merck) with detection by charring with phosphomolybdic acid/EtOH. For flash chromatography, silica Gel (Merck 230-400 mesh) was used. Chromatographic columns were eluted with positive air pressure and eluents are given as volume to volume ratios (v/v). NMR spectra were recorded with a Bruker Avance DPX400 (<sup>1</sup>H, 400 MHz) and Bruker Avance DRX500 (<sup>1</sup>H, 500 MHz), spectrometers. Chemical shifts are reported in ppm, and coupling constants are reported in Hz. Routine spectra were referenced to the residual proton or carbon signals of the solvent. High Resolution mass spectra (HRMS) were recorded in “Centro de Investigación, Tecnología e Innovación de la Universidad de Sevilla” with a Kratos MS-80RFA 241-MC apparatus. Optical rotations were determined with a Perkin-Elmer 341 polarimeter. Elemental analysis were measured in a LECO TruSpec<sup>®</sup> CHNS-932 apparatus. Melting points were measured in STUART SMP3 apparatus in open end capillary tubes. Enantiomeric excesses were measured on a Waters alliance 2695 and Agilent Technologies 1200 series apparatus with stationary chiral phase columns (Chiralcel<sup>®</sup> AD, OD, OD-H, AS-H).

## Synthesis of sulfinamido-olefin ("sulfolefin") ligands<sup>1</sup>

### General method for the synthesis of DAG-derived ligands

A solution of allylamine (375  $\mu$ L, 5 mmol) in THF (7 mL) is cooled to -78 °C for 15 min, then a commercial solution of *n*-BuLi (3.2 mL, 5 mmol) is added dropwise and the reaction is stirred for 2 hours at -78 °C. This solution is added *via cannula* over a solution of the corresponding DAG-sulfinylating agent (2.5 mmol). The reaction is stirred at -78 °C for 5 min, then H<sub>2</sub>O (10 mL) is added carefully. The phases are separated, the aqueous layer is extracted with EtOAc (2x10 mL) and the organic extracts are collected and dried over anhydrous MgSO<sub>4</sub>. The solvent is eliminated under vacuum and the residue is purified by flash chromatography. Eluents are detailed for each case.

### (*S*)-*N*-allyl-methanesulfinamide (1)

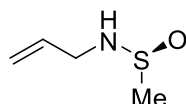

Flash chromatography (EtOAc), yellow oil. Yield: 500 mg, 78%.

$[\alpha]_{20}^D = -3.0$  (*c* 0.7, CHCl<sub>3</sub>).

HPLC: Chiralcel<sup>®</sup> AD column (*n*-hexane/2-propanol, 94:6, 0.5 mL/min); *t*<sub>R</sub>: 33.1 min. (*S*-isomer), 34.9 min. (*R*-isomer).

<sup>1</sup>H NMR (500 MHz, CDCl<sub>3</sub>):  $\delta$  5.95-5.86 (m, 1H), 5.26 (d, *J* = 17.1 Hz, 1H), 5.16 (d, *J* = 10.2 Hz, 1H), 4.11 (bs, 1H), 3.76-3.65 (m, 2H), 2.63 (s, 3H).

<sup>13</sup>C NMR (125 MHz, CDCl<sub>3</sub>):  $\delta$  134.7, 117.4, 44.9, 41.9.

<sup>1</sup>For the synthesis of the racemic ligands for HPLC studies, allylamine was treated with 2 eq. of *n*BuLi followed by quenching with the corresponding racemic sulfinyl chloride according to the following scheme.

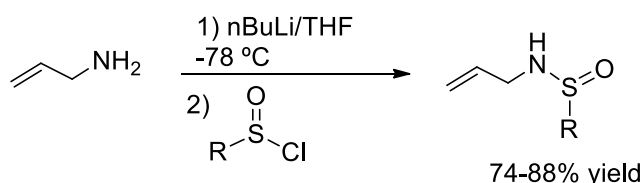

Elemental analysis: Calcd. for C<sub>4</sub>H<sub>9</sub>NOS: C, 40.31%; H, 7.61 %; N, 11.75%; S, 26.90%.  
Found: C, 40.48; H, 7.89%; N, 11.58%; S, 26.92%.

**(S)-N-allyl-isopropanesulfinamide (2)**

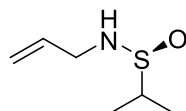

Flash chromatography (EtOAc), yellow oil. Yield: 315 mg, 87%

$[\alpha]_D^{20} = -10.5$  (*c* 0.6, CHCl<sub>3</sub>).

HPLC: Chiralcel<sup>®</sup> AD column (*n*-hexane/2-propanol, 90:10, 0.5 mL/min); *t*<sub>R</sub>: 30.5 min. (*S*-isomer), 34.0 min. (*R*-isomer).

<sup>1</sup>H NMR (500 MHz, CDCl<sub>3</sub>): δ 5.94-5.88 (m, 1H), 5.27 (d, *J* = 17.4 Hz, 1H), 5.17 (d, *J* = 9.0 Hz, 1H), 3.80-3.50 (m, 3H), 2.78 (sep, *J* = 6.3 Hz, 1H), 1.24 (d, *J* = 6.8 Hz, 3H), 1.22 (d, *J* = 6.7 Hz, 3H).

<sup>13</sup>C NMR (125 MHz, CDCl<sub>3</sub>): δ 135.0, 117.2, 53.6, 46.3, 15.6.

Elemental analysis: Calcd. for C<sub>6</sub>H<sub>13</sub>NOS: C, 48.94%; H, 8.90 %; N, 9.51%; S, 21.78%.  
Found: C, 49.05; H, 8.91%; N, 9.31%; S, 21.96%.

**(S)-N-allyl-*p*-toluenesulfinamide (3)**

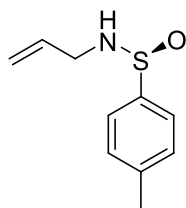

Flash chromatography (Hexane:EtOAc, 1:1), white solid. Yield: 430 mg, 67%

$[\alpha]_D^{20} = -24$  (*c* 0.5, CHCl<sub>3</sub>).

HPLC: Chiralcel<sup>®</sup> AD column (*n*-hexane/2-propanol, 90:10, 0.5 mL/min); *t*<sub>R</sub>: 14.5 min. (*S*-isomer), 19.8 min. (*R*-isomer).

<sup>1</sup>H NMR (500 MHz, CDCl<sub>3</sub>): δ 7.58 (d, *J* = 8.6 Hz, 2H), 7.29 (d, *J* = 7.7 Hz, 2H), 5.87-5.80 (m, 1H), 5.20 (d, *J* = 17.1 Hz, 1H), 5.11 (d, *J* = 10.1 Hz, 1H), 4.17 (bs, 1H), 3.80 (dd, *J* = 5.7 and 14.8 Hz, 1H), 3.70 (dd, *J* = 4.3 and 14.9 Hz, 1H), 2.40 (s, 3H).

<sup>13</sup>C NMR (125 MHz, CDCl<sub>3</sub>): δ 141.3, 134.7, 129.5, 125.9, 117.3, 43.6, 21.3

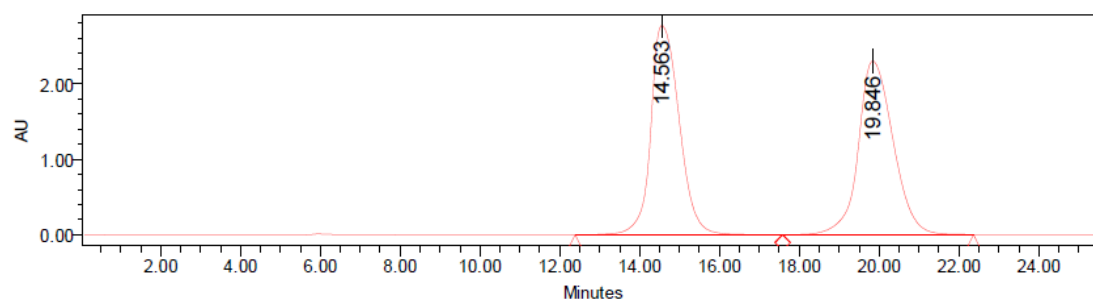

Peak Results

|   | Name | RT     | % Area |
|---|------|--------|--------|
| 1 |      | 14.563 | 49.61  |
| 2 |      | 19.846 | 50.39  |

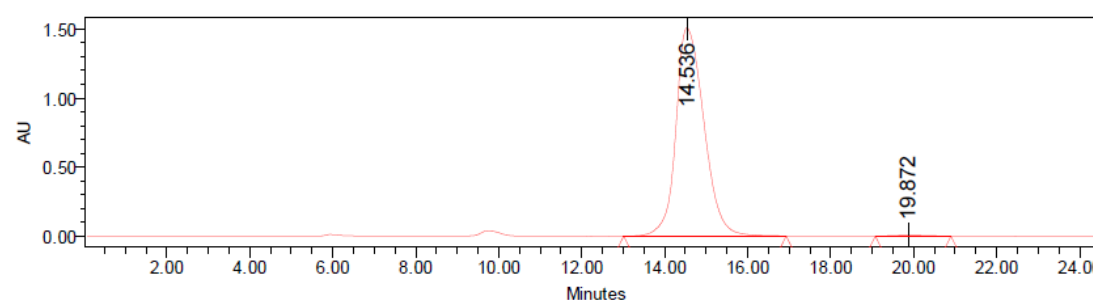

Peak Results

|   | Name | RT     | % Area |
|---|------|--------|--------|
| 1 |      | 14.536 | 99.56  |
| 2 |      | 19.872 | 0.44   |

**(*R*)-*N*-allyl-*tert*-butanesulfinamide (4)**

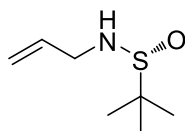

Flash chromatography (Hexane:EtOAc, 1:1), yellow oil. Yield: 669 mg, 83%

$[\alpha]_{20}^D = +12.3$  (*c* 0.6, CHCl<sub>3</sub>).

HPLC: Chiralcel<sup>®</sup> AS-H column (*n*-hexane/2-propanol, 90:10, 0.7 mL/min); *t*<sub>R</sub>: 13.8 min. (*S*-isomer), 24.7 min. (*R*-isomer).

<sup>1</sup>H NMR (500 MHz, CDCl<sub>3</sub>): δ 5.95-5.86 (m, 1H), 5.26 (d, *J* = 17.1 Hz, 1H), 5.16 (d, *J* = 10.2 Hz, 1H), 3.74-3.65 (m, 1H), 3.47-3.39 (m, 1H), 1.22 (s, 9H).

<sup>13</sup>C NMR (125 MHz, CDCl<sub>3</sub>): δ 135.2, 117.0, 55.7, 48.1, 22.5.

Elemental analysis: Calcd. for C<sub>7</sub>H<sub>15</sub>NOS: C, 52.13%; H, 9.38 %; N, 8.69%; S, 19.88%. Found: C, 52.36; H, 9.26%; N, 8.39%; S, 20.10%.

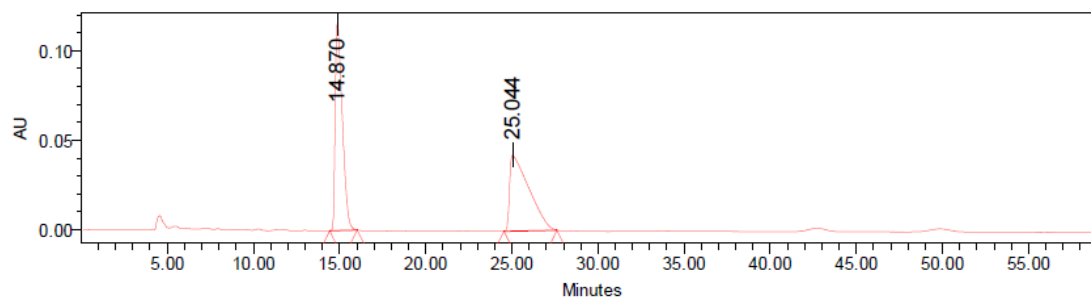

| Peak Results |      |        |        |
|--------------|------|--------|--------|
|              | Name | RT     | % Area |
| 1            |      | 14.870 | 50.06  |
| 2            |      | 25.044 | 49.94  |

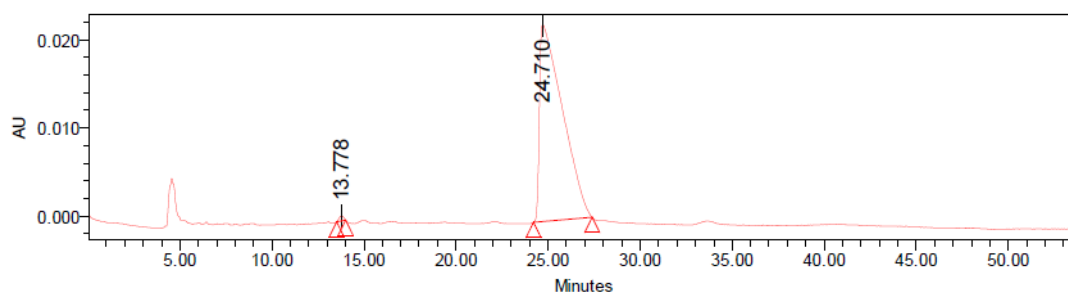

| Peak Results |      |        |        |
|--------------|------|--------|--------|
|              | Name | RT     | % Area |
| 1            |      | 13.778 | 0.48   |
| 2            |      | 24.710 | 99.52  |

**(*R*)-*N*-cinammyl-*tert*-butanesulfinamide (5)**

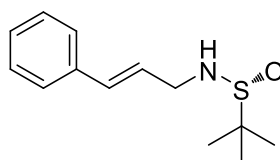

Flash chromatography (Hexane:EtOAc, 1:1) Light yellow solid.

Mp (°C): 58-59 °C

$[\alpha]_{20}^D = -36.1$  (*c* 0.5, CHCl<sub>3</sub>)

HPLC: Chiralcel<sup>®</sup> OD column (*n*-hexane/2-propanol, 90:10, 1 mL/min); *t*<sub>R</sub>: 8.0 min. (*S*-isomer), 13.8 min. (*R*-isomer).

<sup>1</sup>H NMR (500 MHz, CDCl<sub>3</sub>): δ 7.37 (d, *J* = 7.7 Hz, 2H), 7.31 (t, *J* = 7.7 Hz, 2H), 7.24 (t, *J* = 7.2 Hz, 1H), 6.57 (d, *J* = 15.8 Hz, 1H), 6.24 (dt, *J* = 6.2, 15.8 Hz, 1H), 4.02-3.94 (m, 1H), 3.93-3.84 (m, 1H), 3.34 (t, *J* = 5.5 Hz, 1H), 1.24 (s, 9H).

<sup>13</sup>C NMR (125 MHz, CDCl<sub>3</sub>): δ 136.4, 132.5, 128.5, 127.7, 126.4, 55.7, 47.8, 22.6.

Elemental analysis: Calcd. for C<sub>13</sub>H<sub>19</sub>NOS: C, 65.78%; H, 8.07%; N, 5.90%; S, 13.51%.  
Found: C, 65.66%; H, 7.94%; N, 6.15%; S, 13.79%.

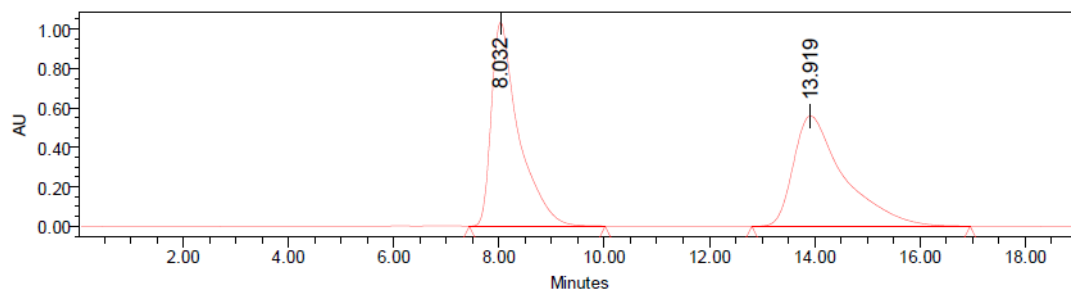

Peak Results

|   | Name | RT     | % Area |
|---|------|--------|--------|
| 1 |      | 8.032  | 49.99  |
| 2 |      | 13.919 | 50.01  |

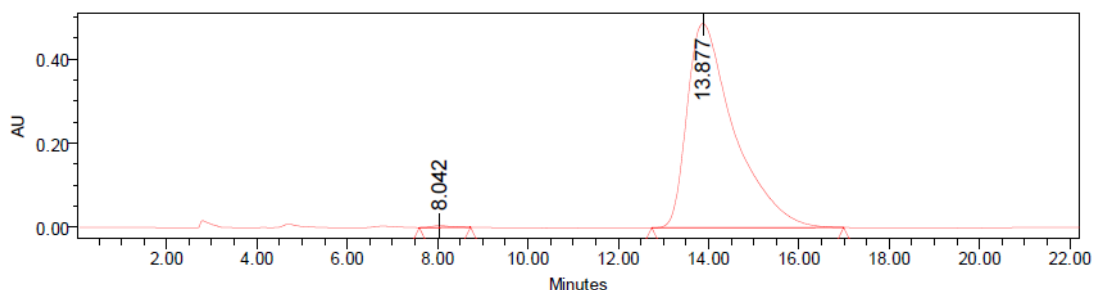

Peak Results

|   | Name | RT     | % Area |
|---|------|--------|--------|
| 1 |      | 8.042  | 0.37   |
| 2 |      | 13.877 | 99.63  |

### Representative procedure for the Rh(I) catalyzed 1,4-addition of boronic acids to enones

A mixture of sulfolefin ligand **5** (7.1 mg, 0.03 mmol) and [Rh(C<sub>2</sub>H<sub>4</sub>)<sub>2</sub>Cl]<sub>2</sub> (6.0 mg, 0.015 mmol) is stirred for 0.5 hours in 1.2 mL of degassed solvent. PhB(OH)<sub>2</sub> (146 mg, 1.2 mmol) is added over the catalyst and sequentially the  $\alpha,\beta$ -unsaturated carbonyl compound (0.6 mmol) and 2.5 M KOH aqueous solution (120  $\mu$ L, 2.5 M). The reaction is followed by TLC, and once the starting material is consumed, the crude reaction mixture is purified by flash chromatography. The eluents are detailed for each case.

### (*R*)-3-Phenyl-cyclohexanone (**8**)



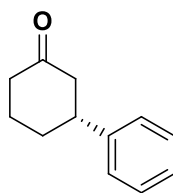

Following the typical procedure for the 1,4-addition, the reaction of cyclohexenone **6** (58  $\mu$ L, 0.6 mmol) and phenyl boronic acid **7** (146 mg, 1.2 mmol) gave, after flash chromatography (Hexane:Et<sub>2</sub>O, 9:1), the product **8** as a colourless oil. Yield: 97.2 mg, 93%

$[\alpha]_{20}^D = -18.3$  (*c* 0.9, CHCl<sub>3</sub>).

HPLC: 99 % ee, Chiralcel<sup>®</sup> OD-H column (*n*-hexane/2-propanol, 90:10, 0.5 mL/min); *t<sub>R</sub>*: 21.8 min (major), 23.7 min (minor).

<sup>1</sup>H NMR (500 MHz, CDCl<sub>3</sub>):  $\delta$  7.33-7.36 (m, 2H), 7.21-7.26 (m, 3H), 3.01(m, 1H), 2.37-2.59 (m, 4H), 2.07-2.16 (m, 2H), 1.80-1.89 (m, 2H).

<sup>13</sup>C NMR (125 MHz, CDCl<sub>3</sub>):  $\delta$ , 210.9, 144.3, 128.6, 126.6, 126.5, 48.9, 44.7, 41.1, 32.7, 25.5

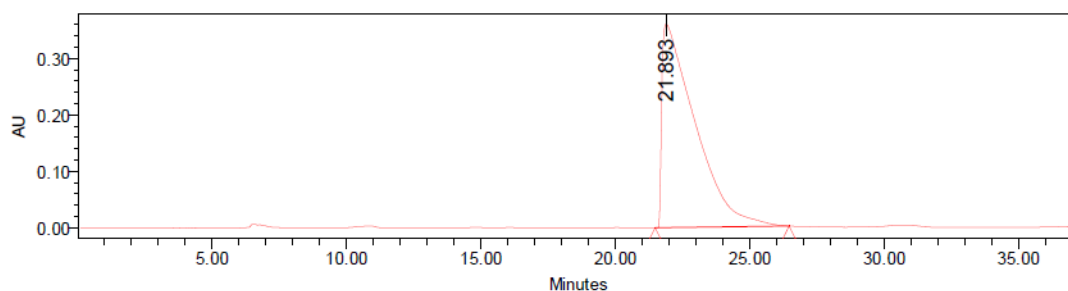

Peak Results

|   | Name | RT     | % Area |
|---|------|--------|--------|
| 1 |      | 21.893 | 100.00 |

### (*R*)-3-Phenyl-cyclopentanone (**12**)

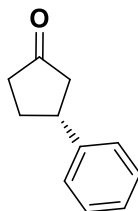

Following the typical procedure for the 1,4-addition, the reaction of 2-cyclopentenone **9** (50  $\mu$ L, 0.6 mmol) and phenyl boronic acid **7** (146 mg, 1.2 mmol) gave the product **12**, after flash chromatography (Hexane:Et<sub>2</sub>O, 9:1), as a colorless oil. Yield: 89.4 mg, 93%.

$[\alpha]_{20}^D = -123.6$  ( $c$  0.5,  $\text{CHCl}_3$ )

HPLC: 99 % ee, Chiralcel<sup>®</sup> OB column (*n*-hexane/2-propanol, 90:10, 0.5 mL/min);  $t_R$ : 30.5 min. (minor), 34.0 min. (major).

$^1\text{H}$  NMR (500 MHz,  $\text{CDCl}_3$ ):  $\delta$  7.33-7.38 (m, 2H), 7.23-7.28 (m, 3H), 3.40-3.48 (m, 1H), 2.62-2.71 (m, 1H), 2.30-2.49 (m, 4H), 1.98-2.02 (m, 1H) ppm.

$^{13}\text{C}$  NMR (125 MHz,  $\text{CDCl}_3$ ):  $\delta$  218.1, 142.9, 128.5, 126.5, 126.5, 45.6, 42.0, 38.7, 31.0. ppm

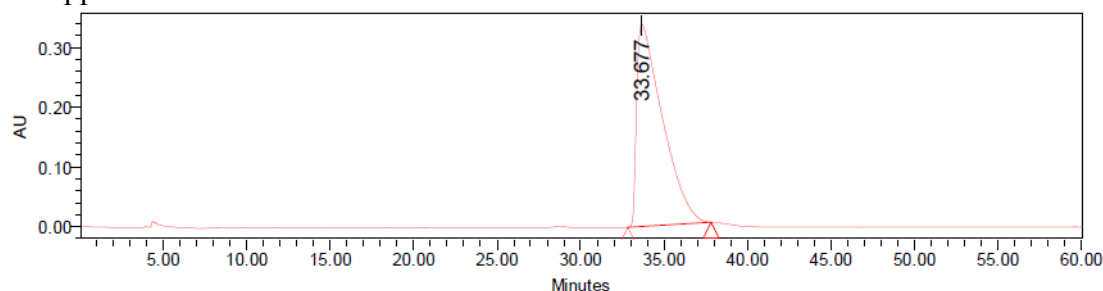

Peak Results

|   | Name | RT     | % Area |
|---|------|--------|--------|
| 1 |      | 33.677 | 100.00 |

### (*R*)-3-Phenyl-cycloheptanone (**13**)

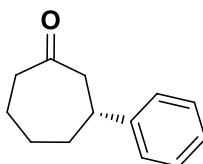

Following the typical procedure for the 1,4-addition, the reaction of 2-cycloheptenone **10** (66.8  $\mu\text{L}$ , 0.6 mmol) and phenyl boronic acid **7** (146 mg, 1.2 mmol) gave the product **13**, after flash chromatography (Hexane: $\text{Et}_2\text{O}$ , 9:1), as a colorless oil. Yield: 103.9 mg, 92%.

$[\alpha]_{20}^D = -72.6$  ( $c$  0.8,  $\text{CHCl}_3$ ).

HPLC: 96% ee, Chiralcel<sup>®</sup> OD-H column (*n*-hexane/2-propanol, 90:10, 0.5 mL/min);  $t_R$ : 10.7 min. (major), 12.5 min. (minor).

$^1\text{H}$  NMR (500 MHz,  $\text{CDCl}_3$ ):  $\delta$  7.26-7.32 (m, 2H), 7.16-7.22 (m, 3H), 2.90-2.94 (m, 2H), 2.57-2.67 (m, 3H), 2.03-2.07 (m, 3H), 1.72-1.75 (m, 2H), 1.51 (m, 1H) ppm.

$^{13}\text{C}$  NMR (125 MHz,  $\text{CDCl}_3$ ):  $\delta$  213.3, 146.8, 128.5, 126.3, 126.2, 51.2, 43.8, 42.6, 39.1, 29.1, 24.1 ppm.

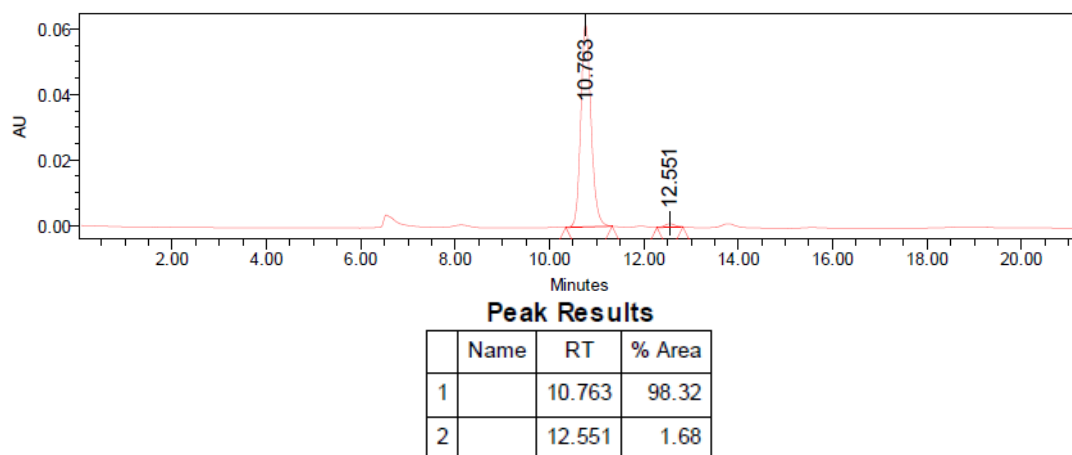

**(R)-4-phenyl-tetrahydro-2H-pyran-2-one (14)**

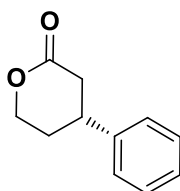

Following the typical procedure for the 1,4-addition, the reaction of 5,6-dihydro-2*H*-pyran-2-one **11** (58.8  $\mu$ L, 0.6 mmol) and phenyl boronic acid **7** (146 mg, 1.2 mmol) gave the product **14**, after flash chromatography (Hexane:Et<sub>2</sub>O, 9:1), as a colorless oil. Yield: 101.5 mg, 96%.

$[\alpha]_{20}^D = -8.3$  (*c* 0.7, CHCl<sub>3</sub>)

HPLC: 99% ee, Chiralcel<sup>®</sup> OD-H column (n-hexane/2-propanol, 90:10, 0.5 mL/min); *t*<sub>R</sub>: 51.6 min. (major), 61.4 min. (minor).

<sup>1</sup>H NMR (500 MHz, CDCl<sub>3</sub>):  $\delta$  7.20-7.39 (m, 5H), 4.38-4.52 (m, 2H), 3.22-3.26 (m, 1H), 2.88-2.96 (m, 1H), 2.64 (dd, *J* = 10.6 Hz, *J* = 17.6 Hz, 1H), 2.00-2.16 (m, 2H) ppm.

<sup>13</sup>C NMR (125 MHz, CDCl<sub>3</sub>):  $\delta$  170.6, 142.8, 128.9, 127.2, 126.4, 68.6, 37.4, 30.3 ppm.

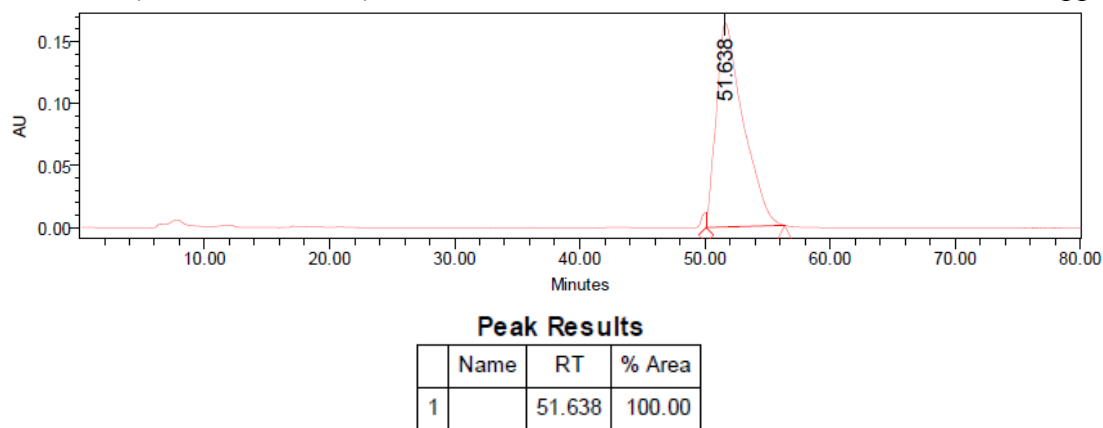

**(R)-4-phenylpentan-2-one (16)**

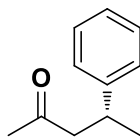

Following the typical procedure for the 1,4-addition, the reaction of 3-penten-2-one **15** (83.1  $\mu$ L, 0.6 mmol) and phenyl boronic acid **7** (146 mg, 1.2 mmol) gave the product **16**, after flash chromatography (Hexane:Et<sub>2</sub>O, 9:1), as a colorless oil. Yield: 75.9 mg, 78%.  $[\alpha]_D^{20} = -20.8$  ( $c$  0.8, CHCl<sub>3</sub>).

HPLC: 94% ee, Chiralcel<sup>®</sup> AS-H column (n-hexane/2-propanol, 98:2, 0.5 mL/min);  $t_R$ : 15.1 min. (major), 18.1 min (minor).

<sup>1</sup>H NMR (500 MHz, CDCl<sub>3</sub>):  $\delta$  7.17-7.32 (m, 5H), 3.28-3.34 (m, 1H), 2.61- 2.80 (m, 2H), 2.06 (s, 3H), 2.01(d,  $J$  = 6.9Hz, 3H) ppm.

<sup>13</sup>C NMR (125 MHz, CDCl<sub>3</sub>):  $\delta$  207.7, 146.1, 128.5, 126.7, 126.2, 51.9, 35.4, 30.5, 21.9 ppm.

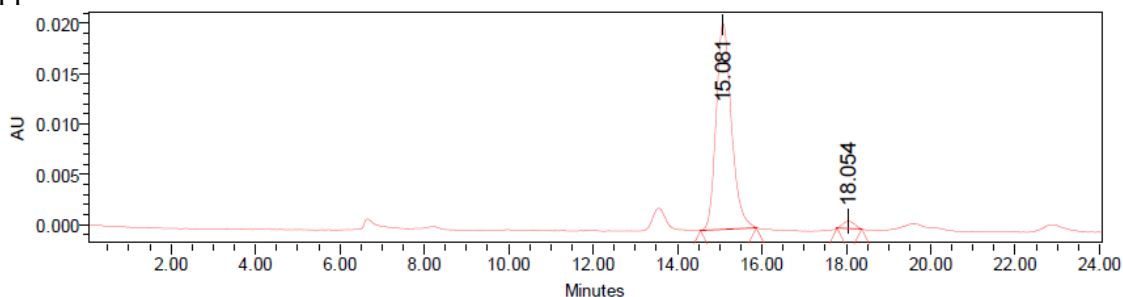

**Peak Results**

|   | Name | RT     | % Area |
|---|------|--------|--------|
| 1 |      | 15.081 | 97.35  |
| 2 |      | 18.054 | 2.65   |

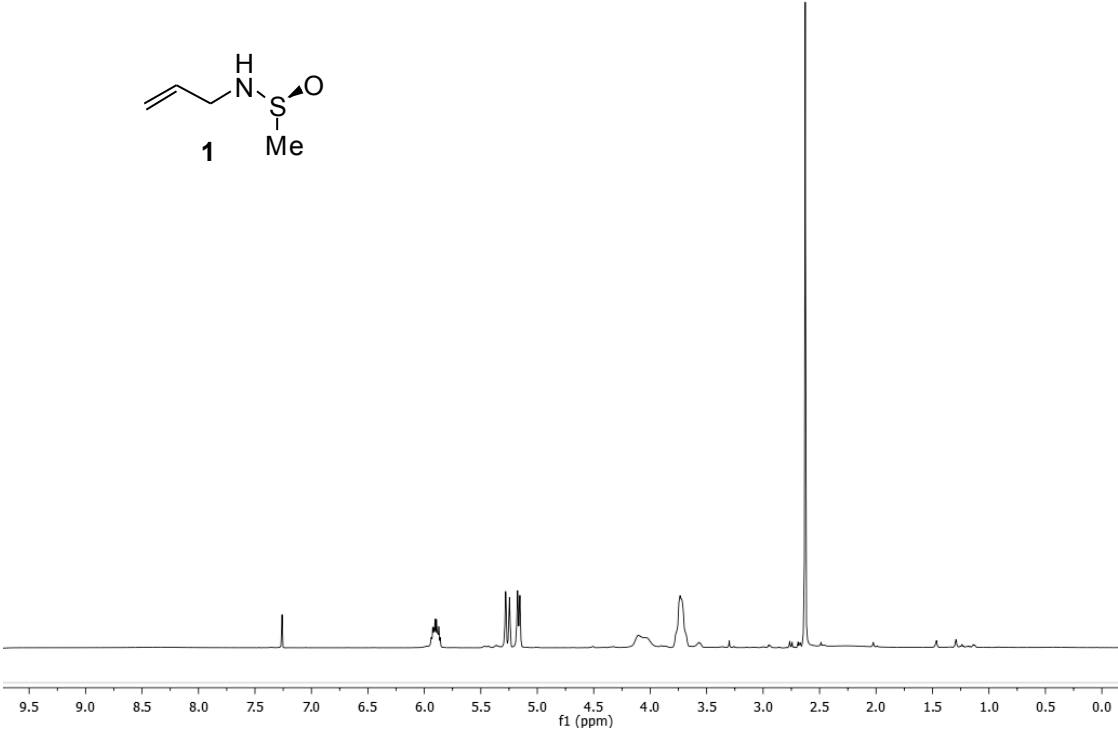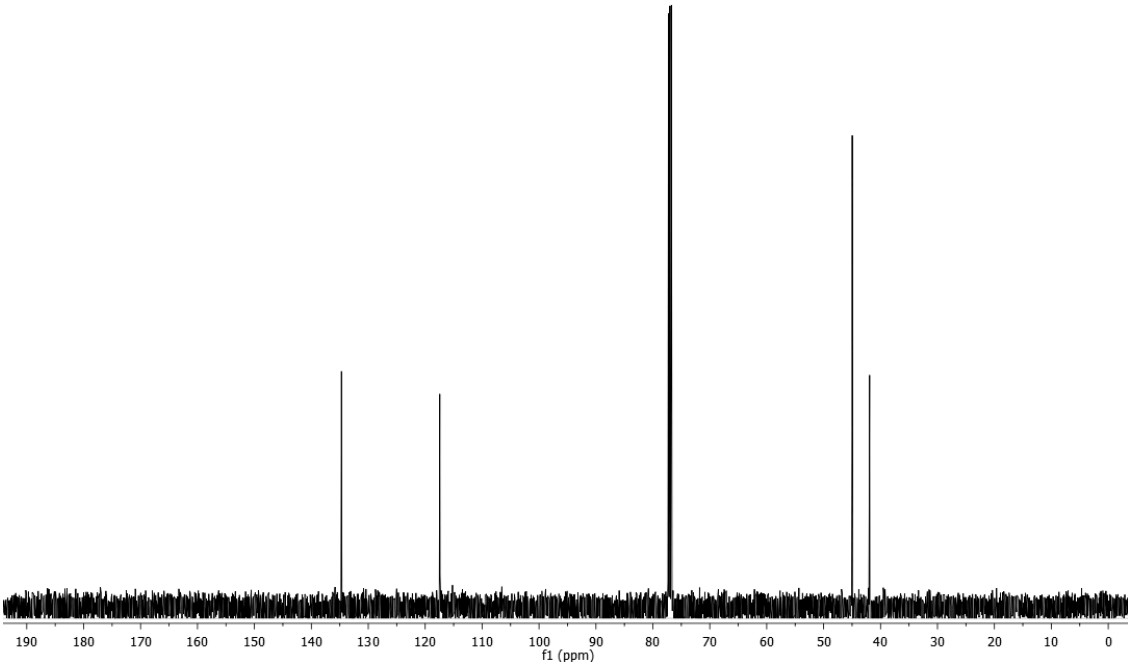

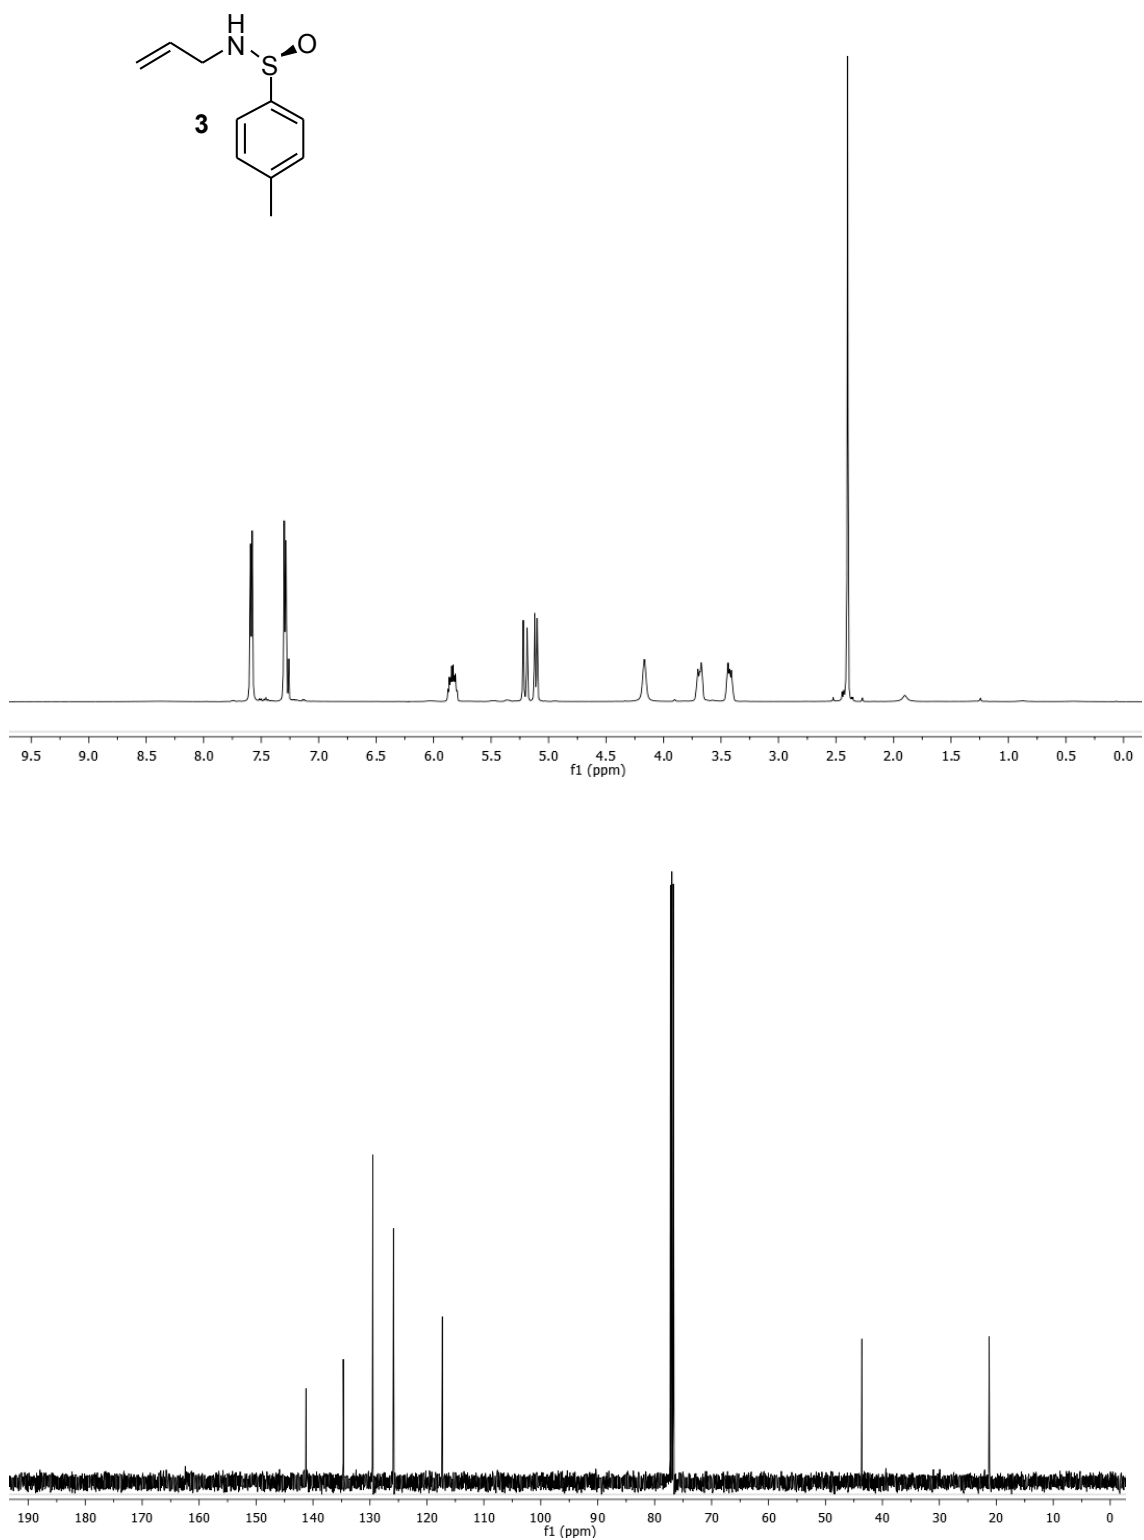

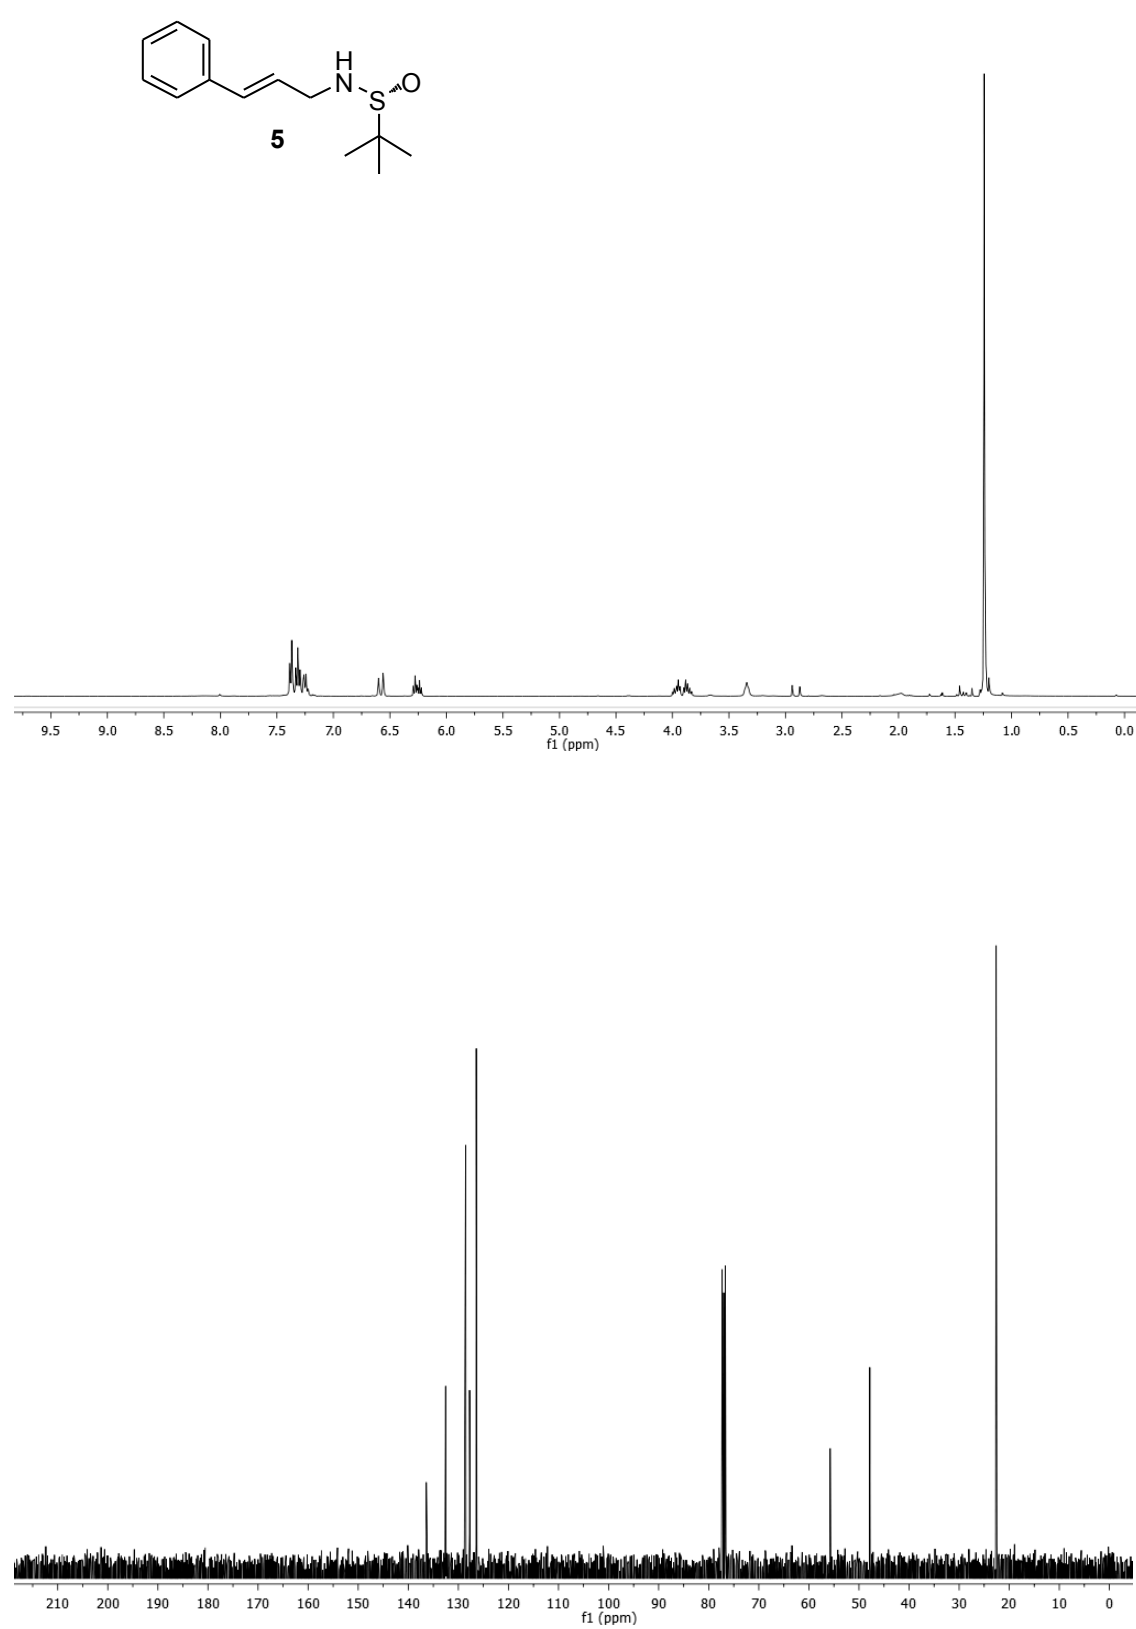

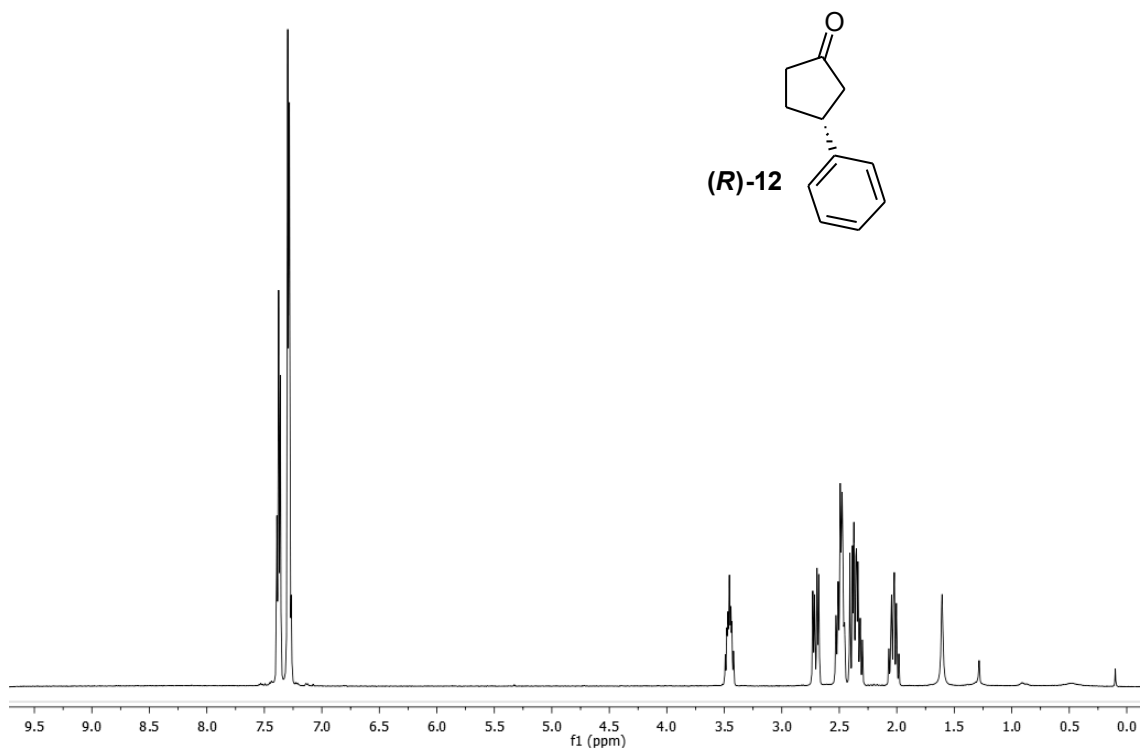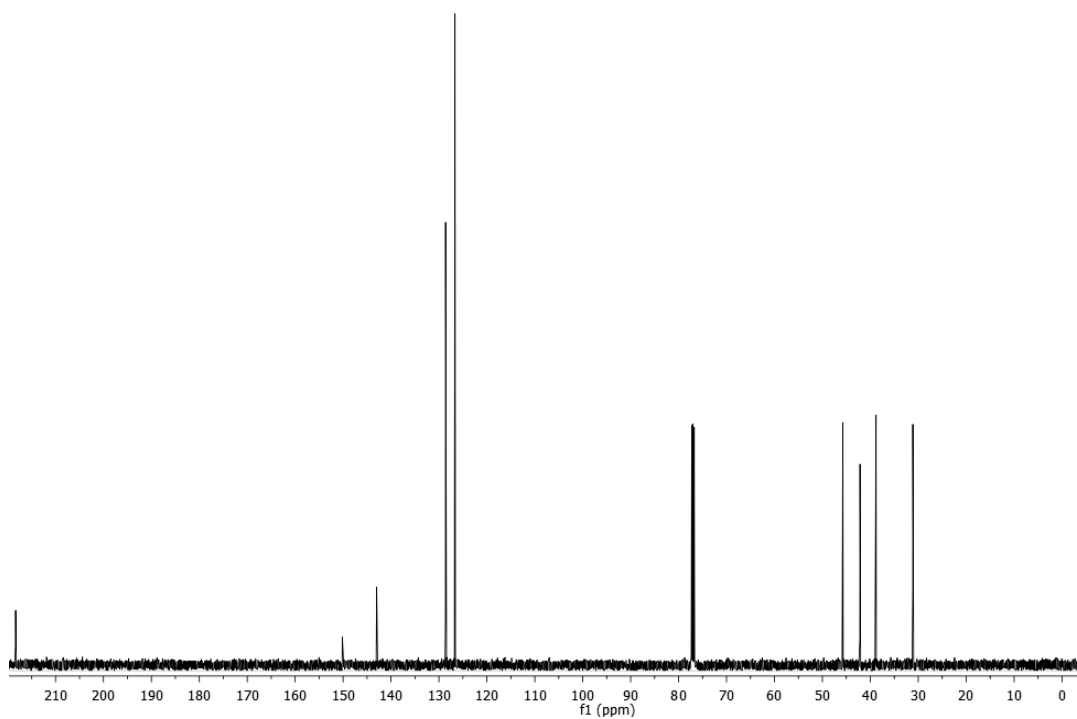



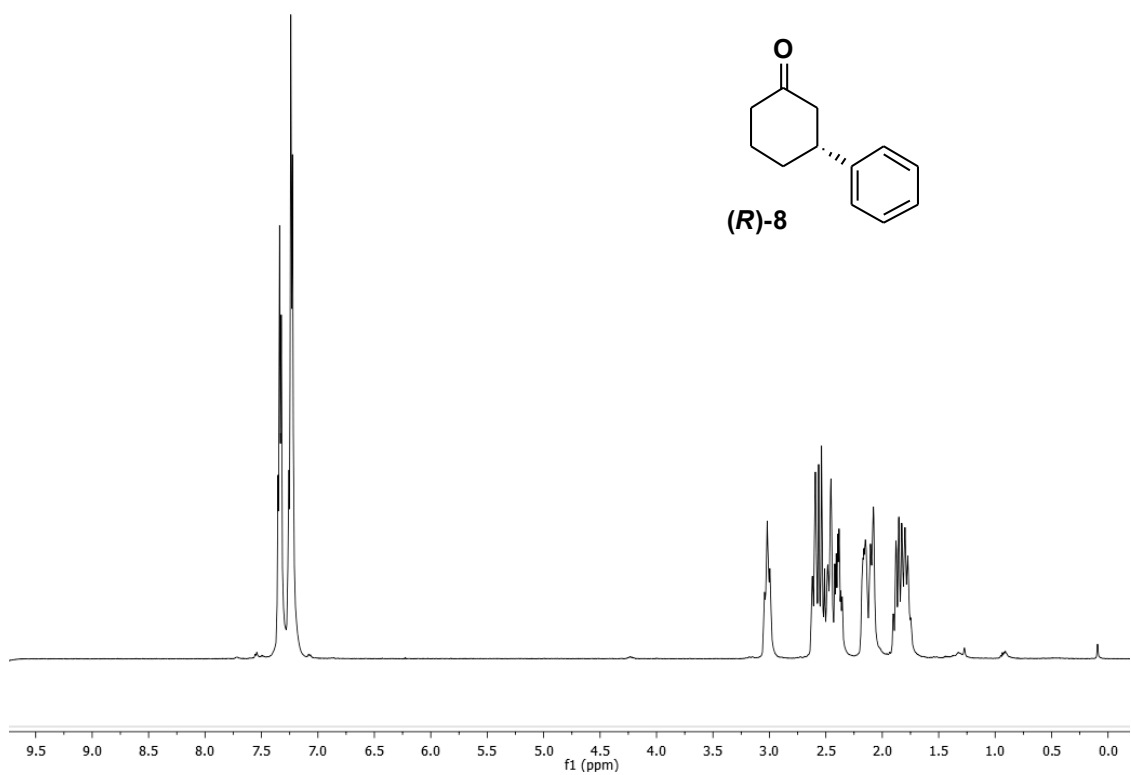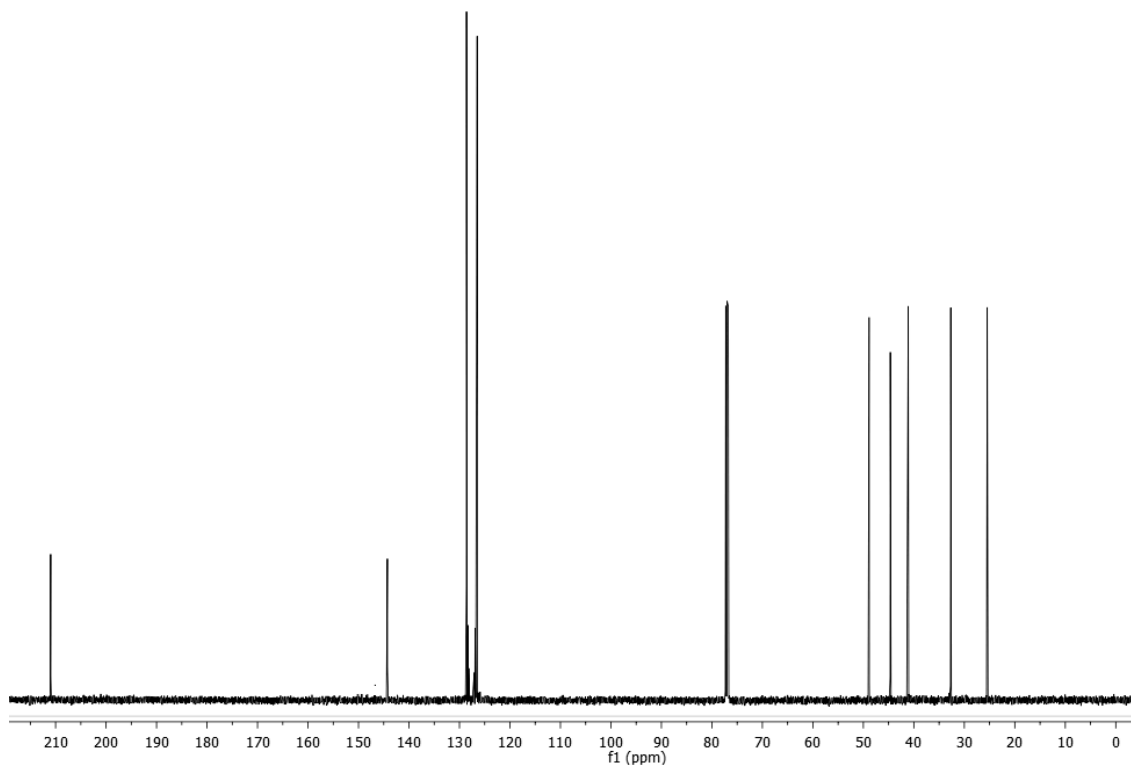

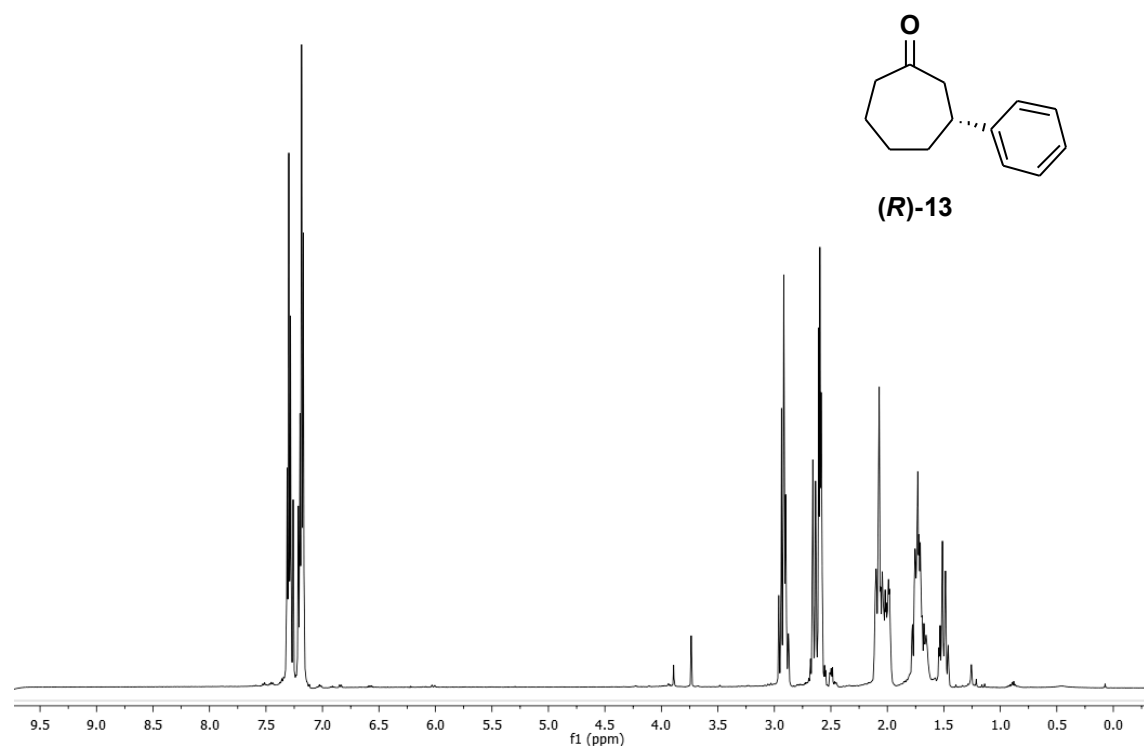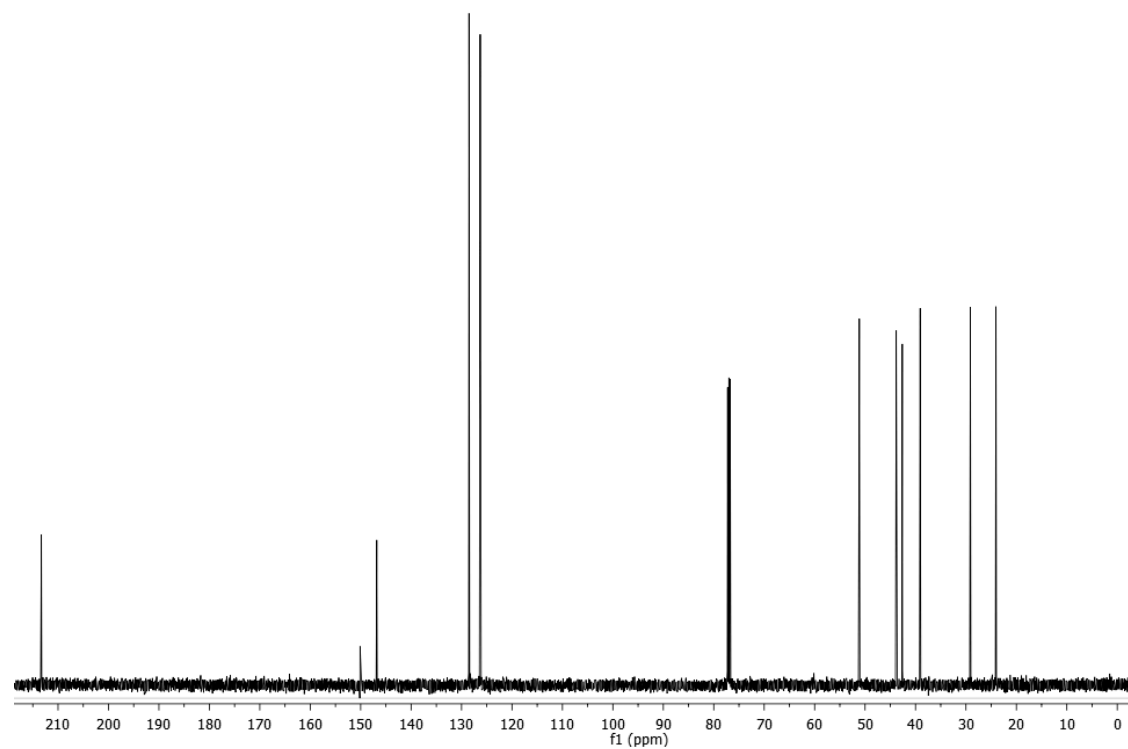

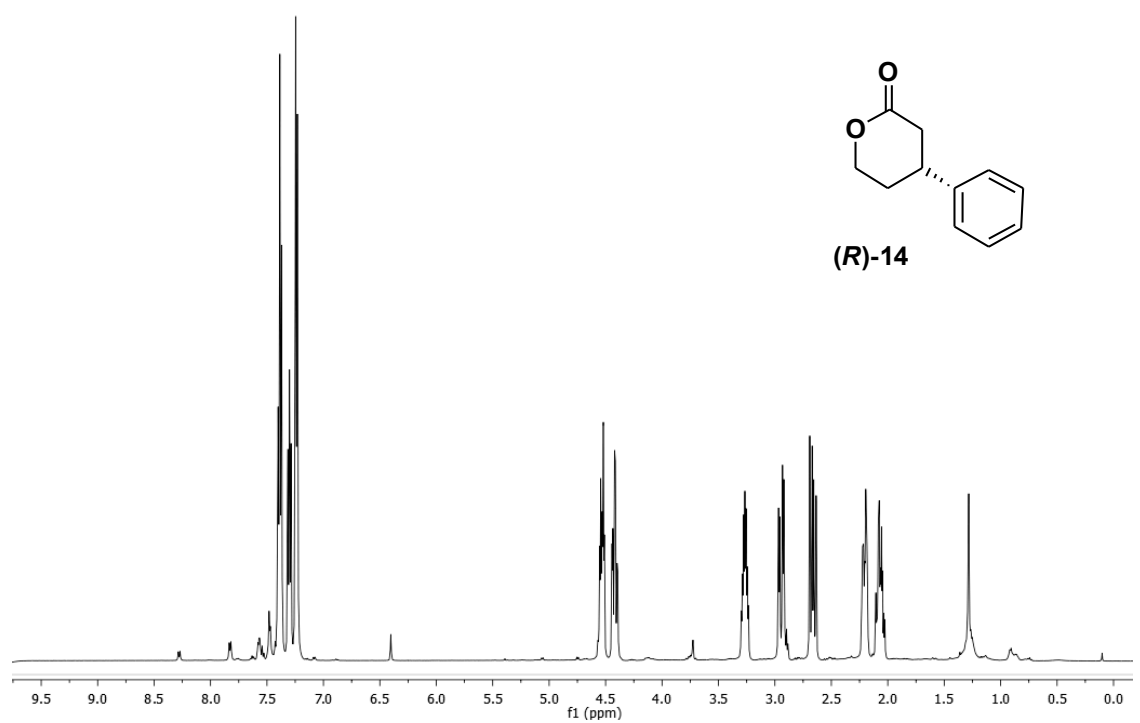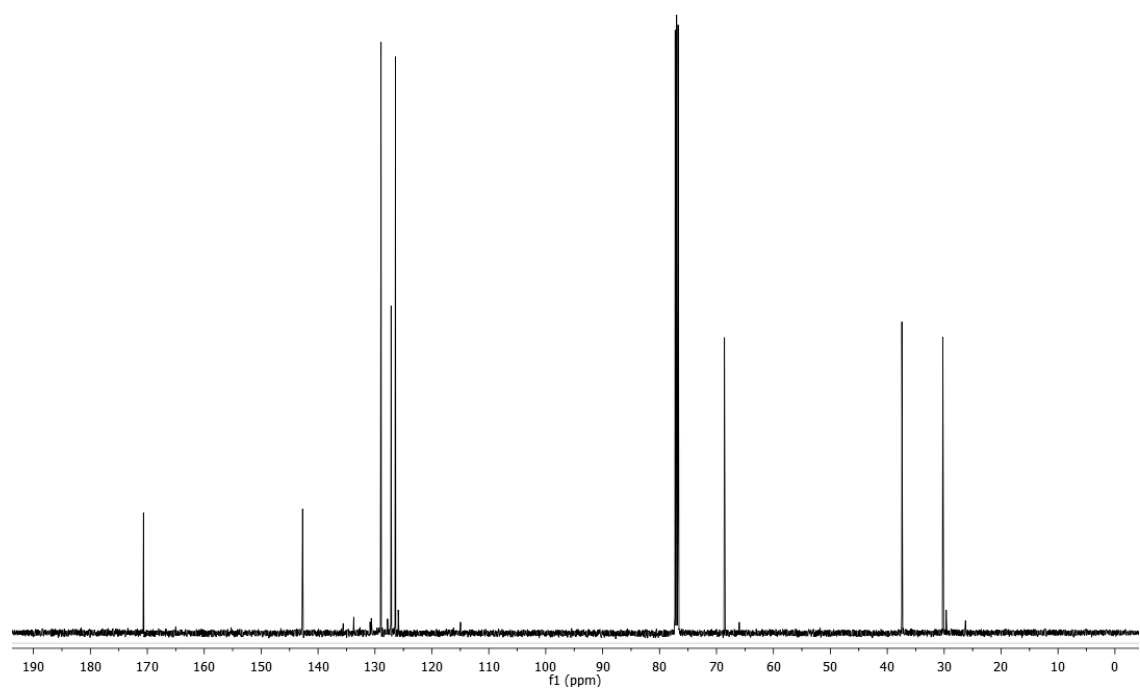

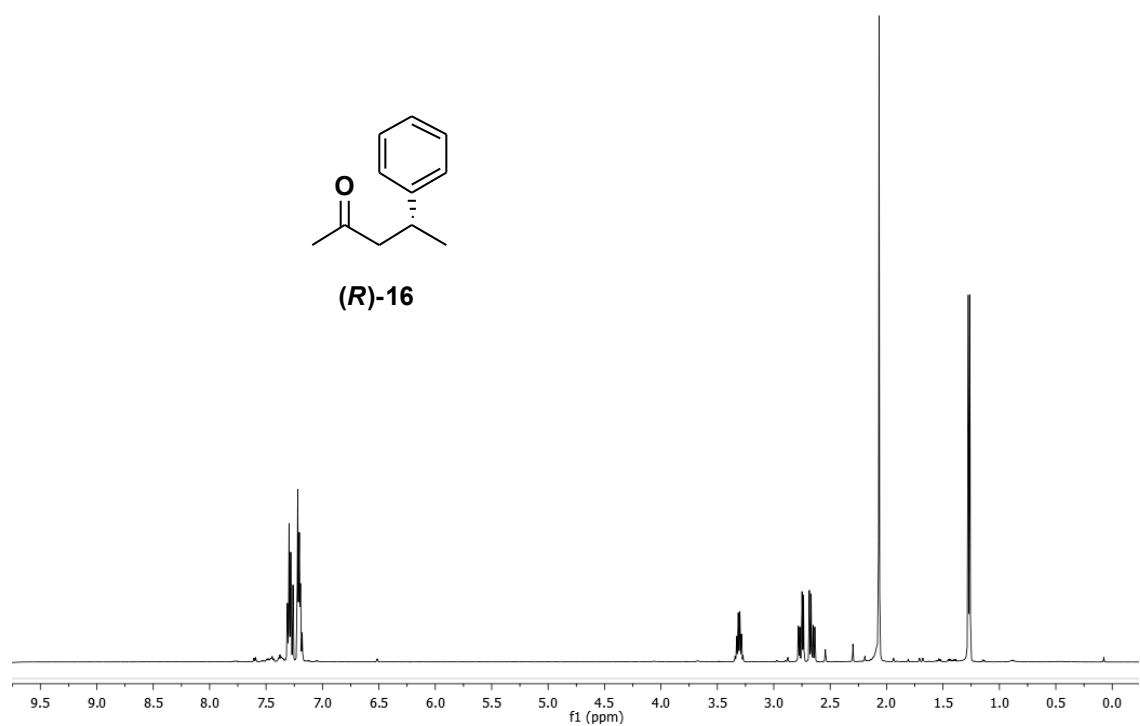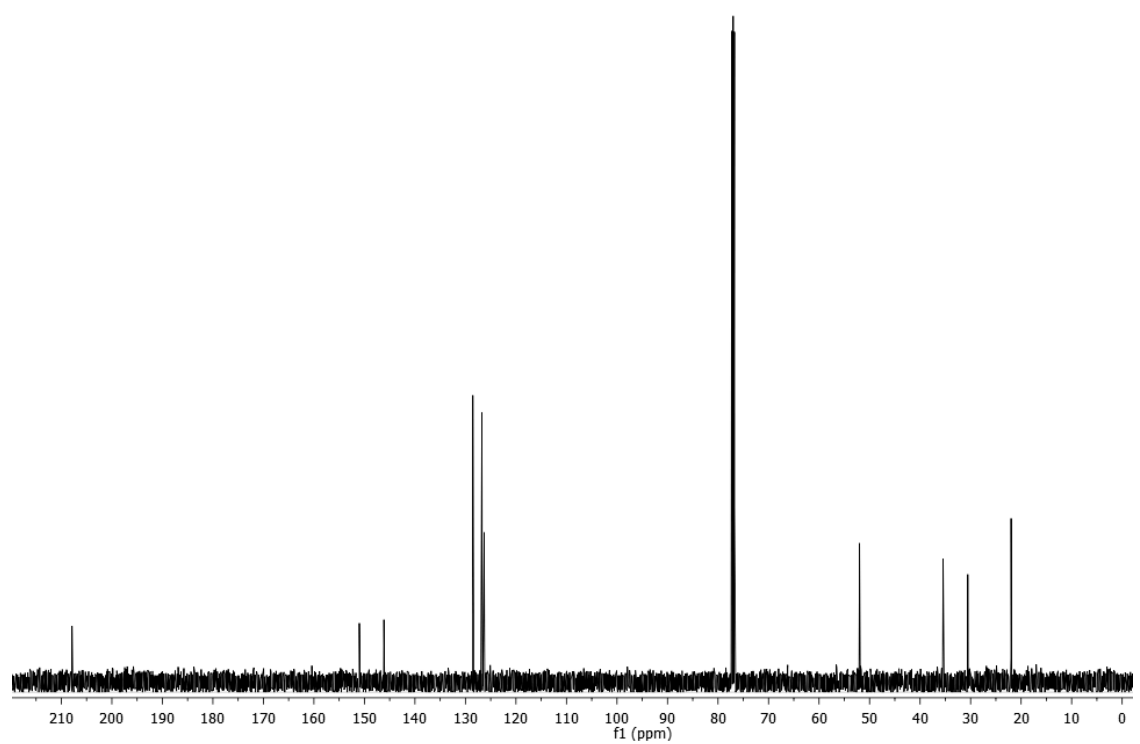

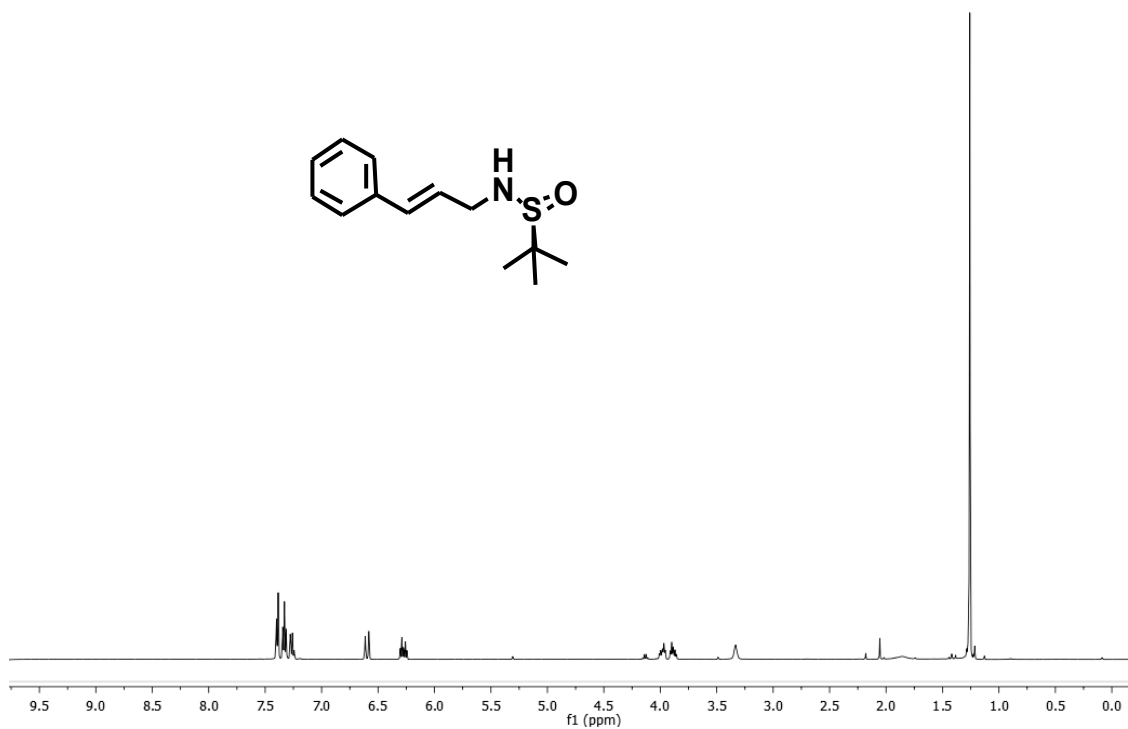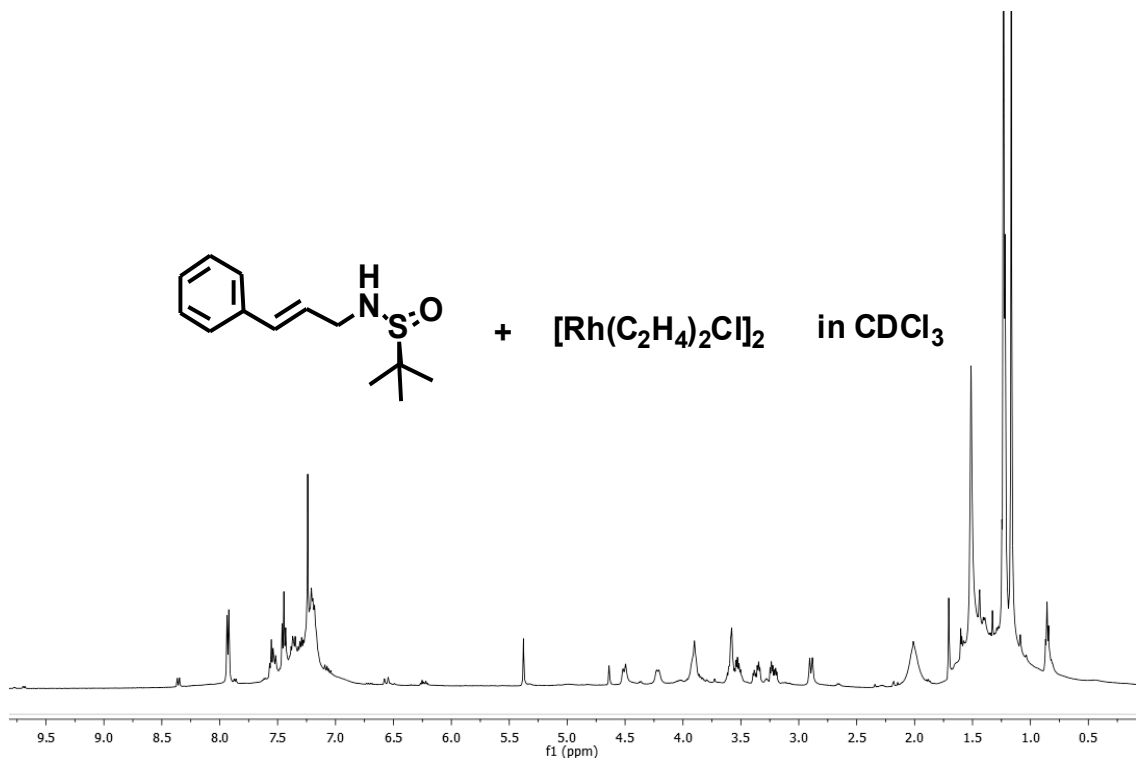

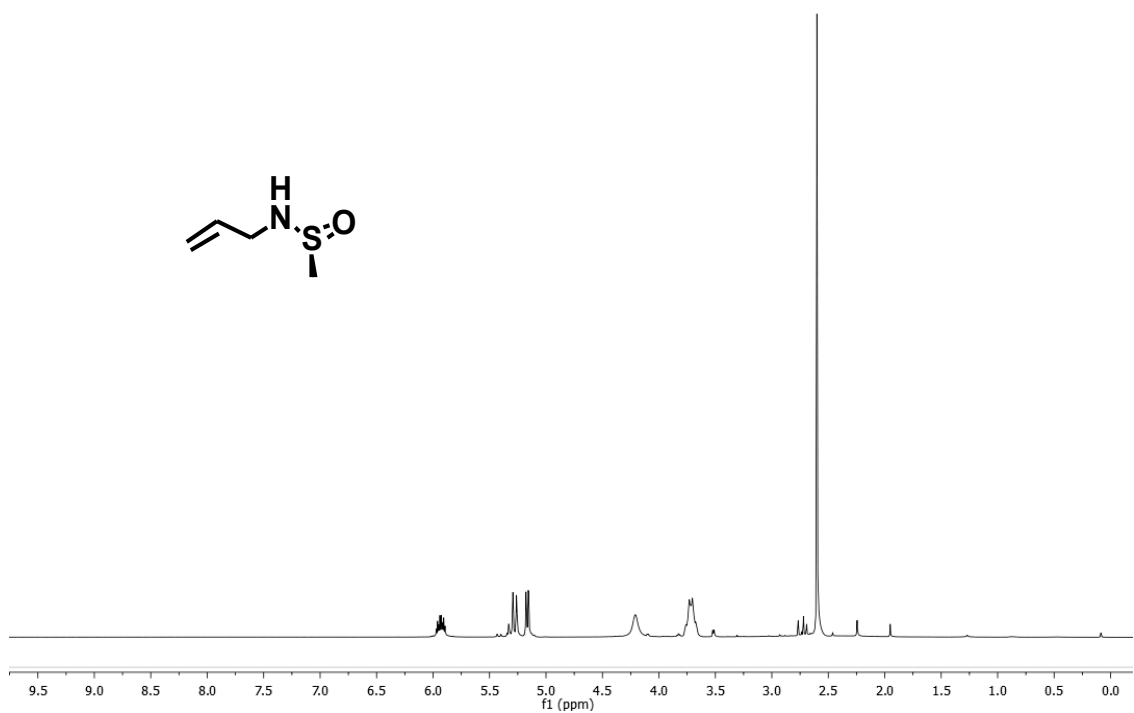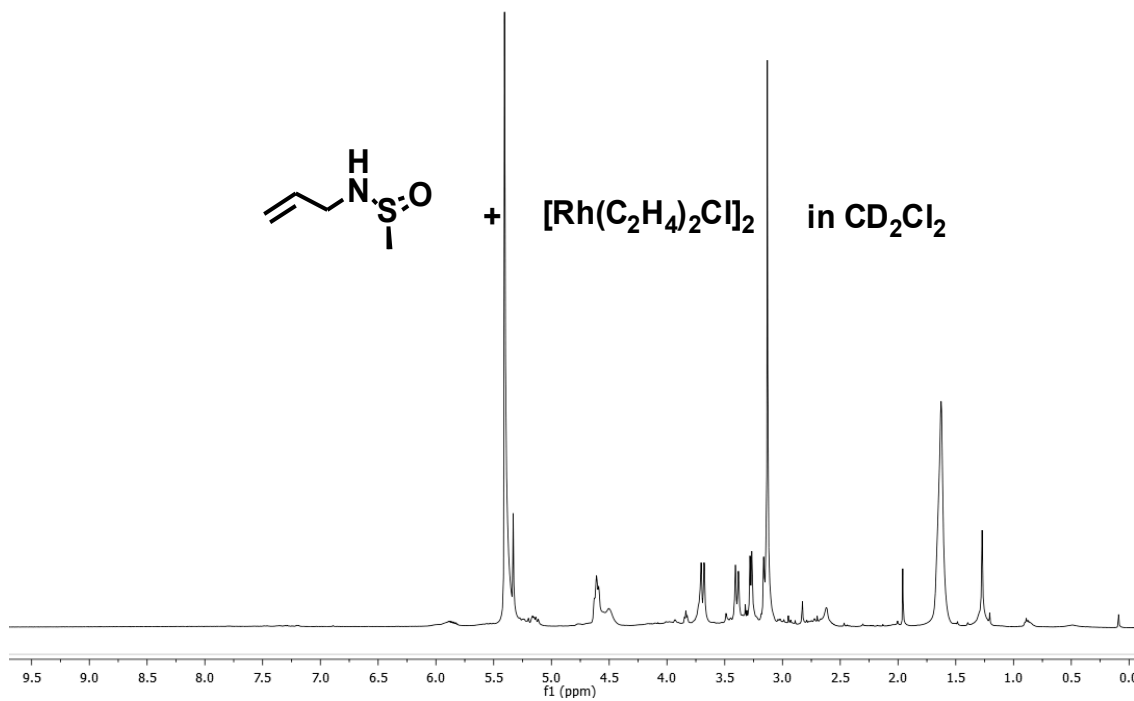

Supplement: c2ob07132k.pdf [file c2ob07132k.pdf]
